# Supplementary material for: Necroptosis Induced by Delta-Tocotrienol Overcomes Docetaxel Chemoresistance in Prostate Cancer Cells
Source: MDPI journal article supplement (doi:10.3390/ijms24054923), 2023-03-03

**Figure 1E**

**DU145**

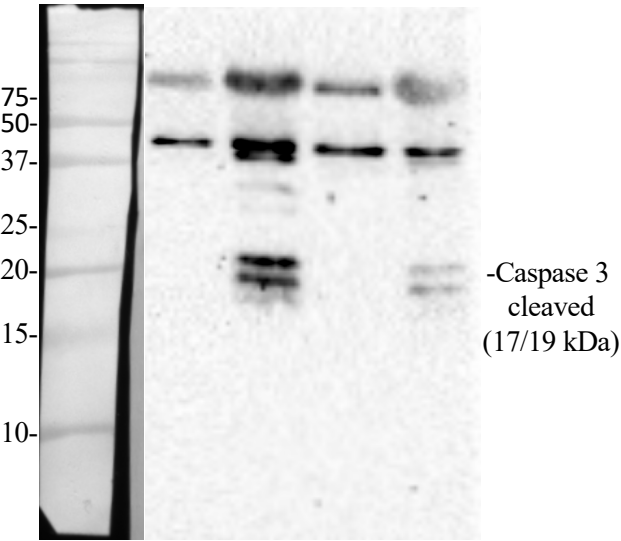

**PC3**

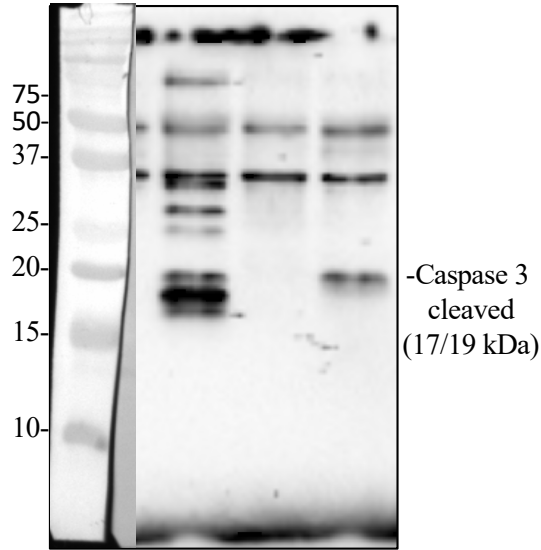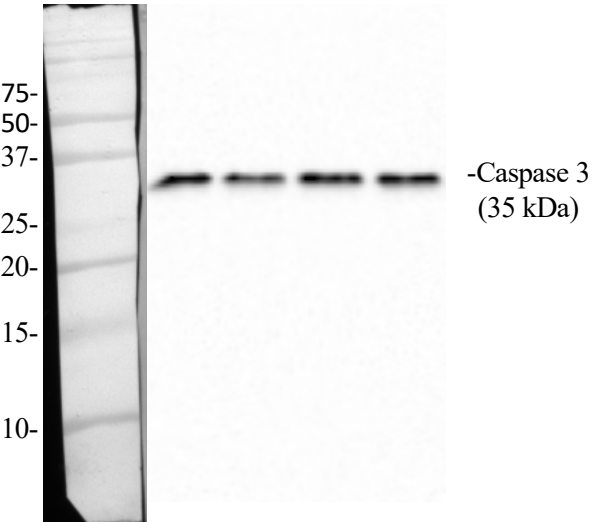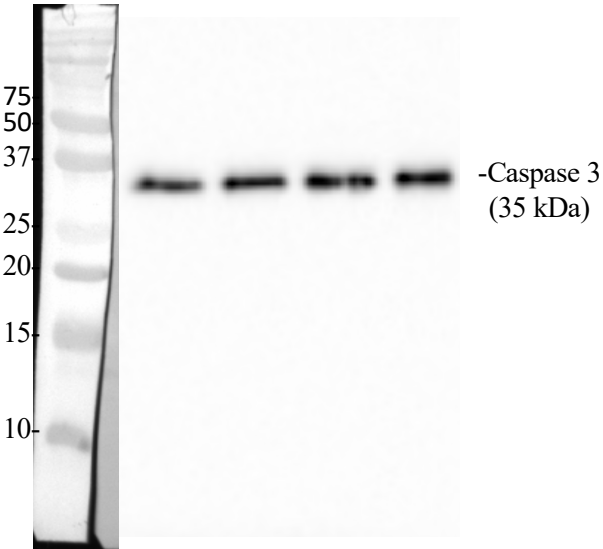

Figure 2A

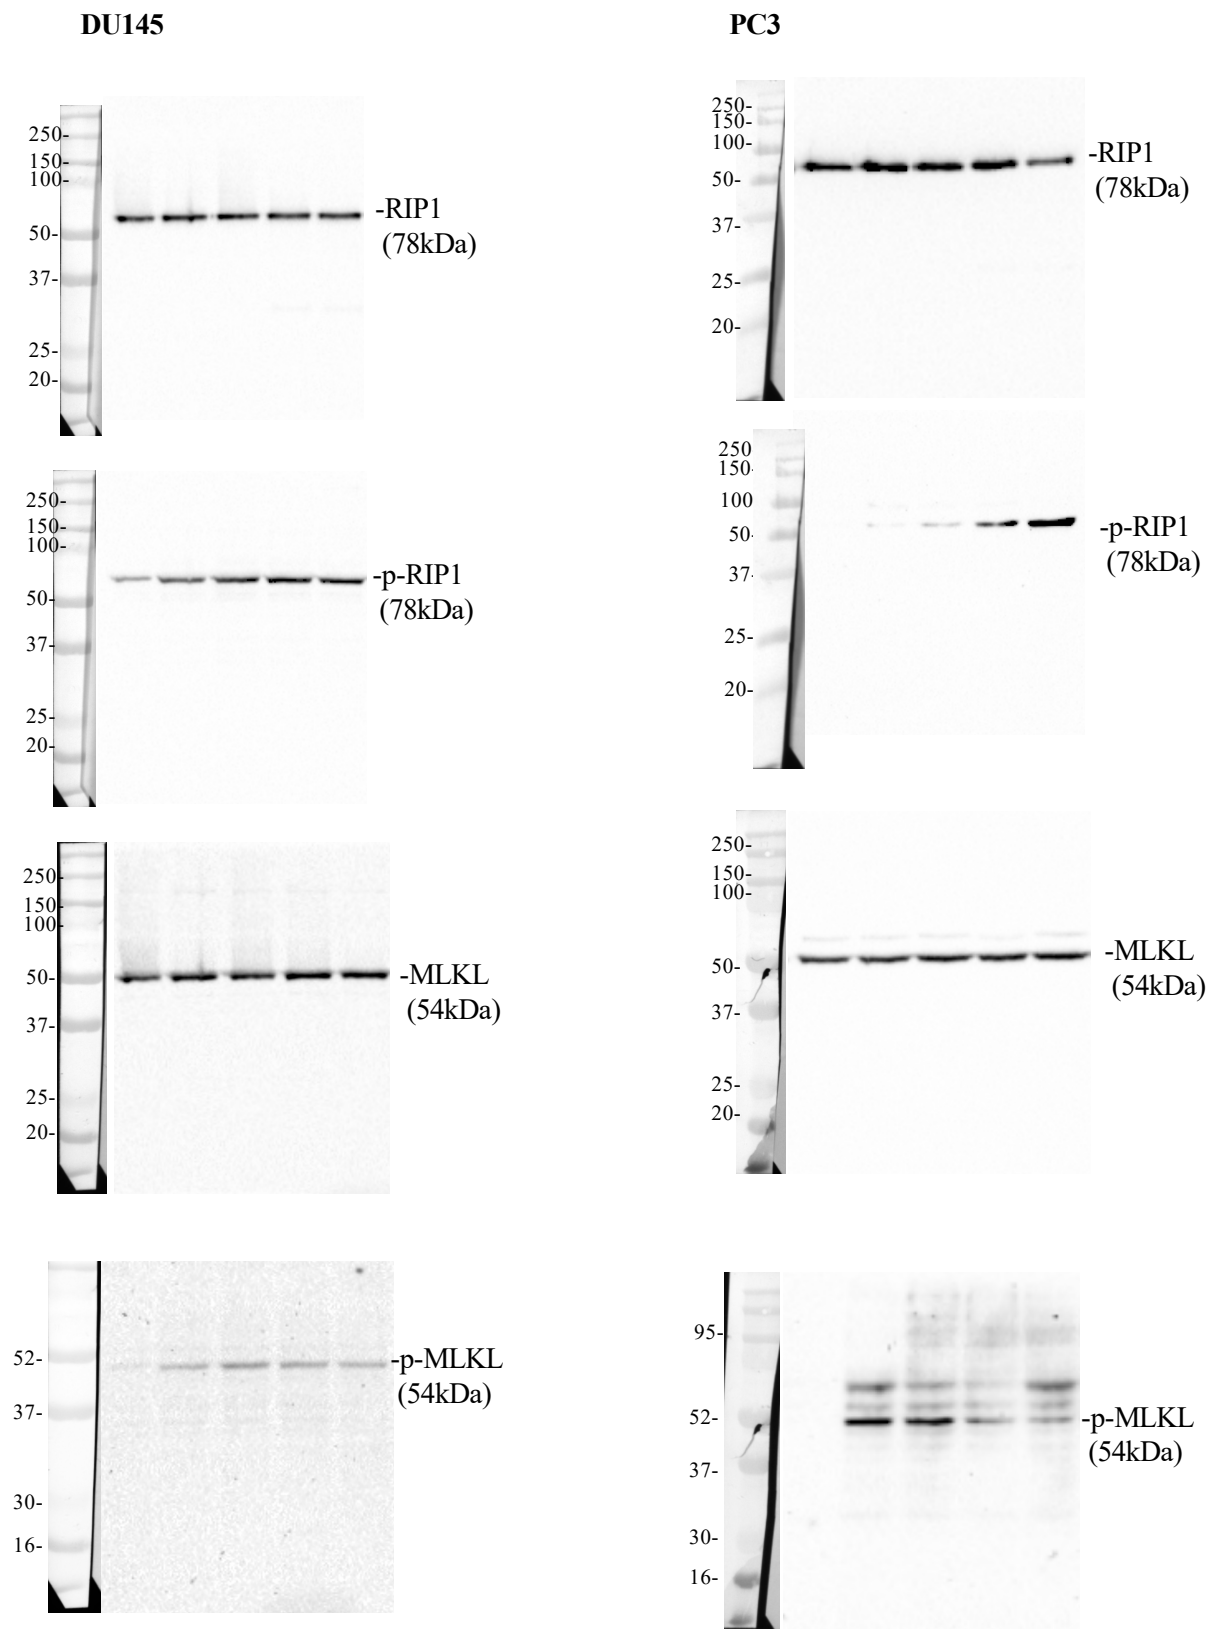

**Figure 2B**

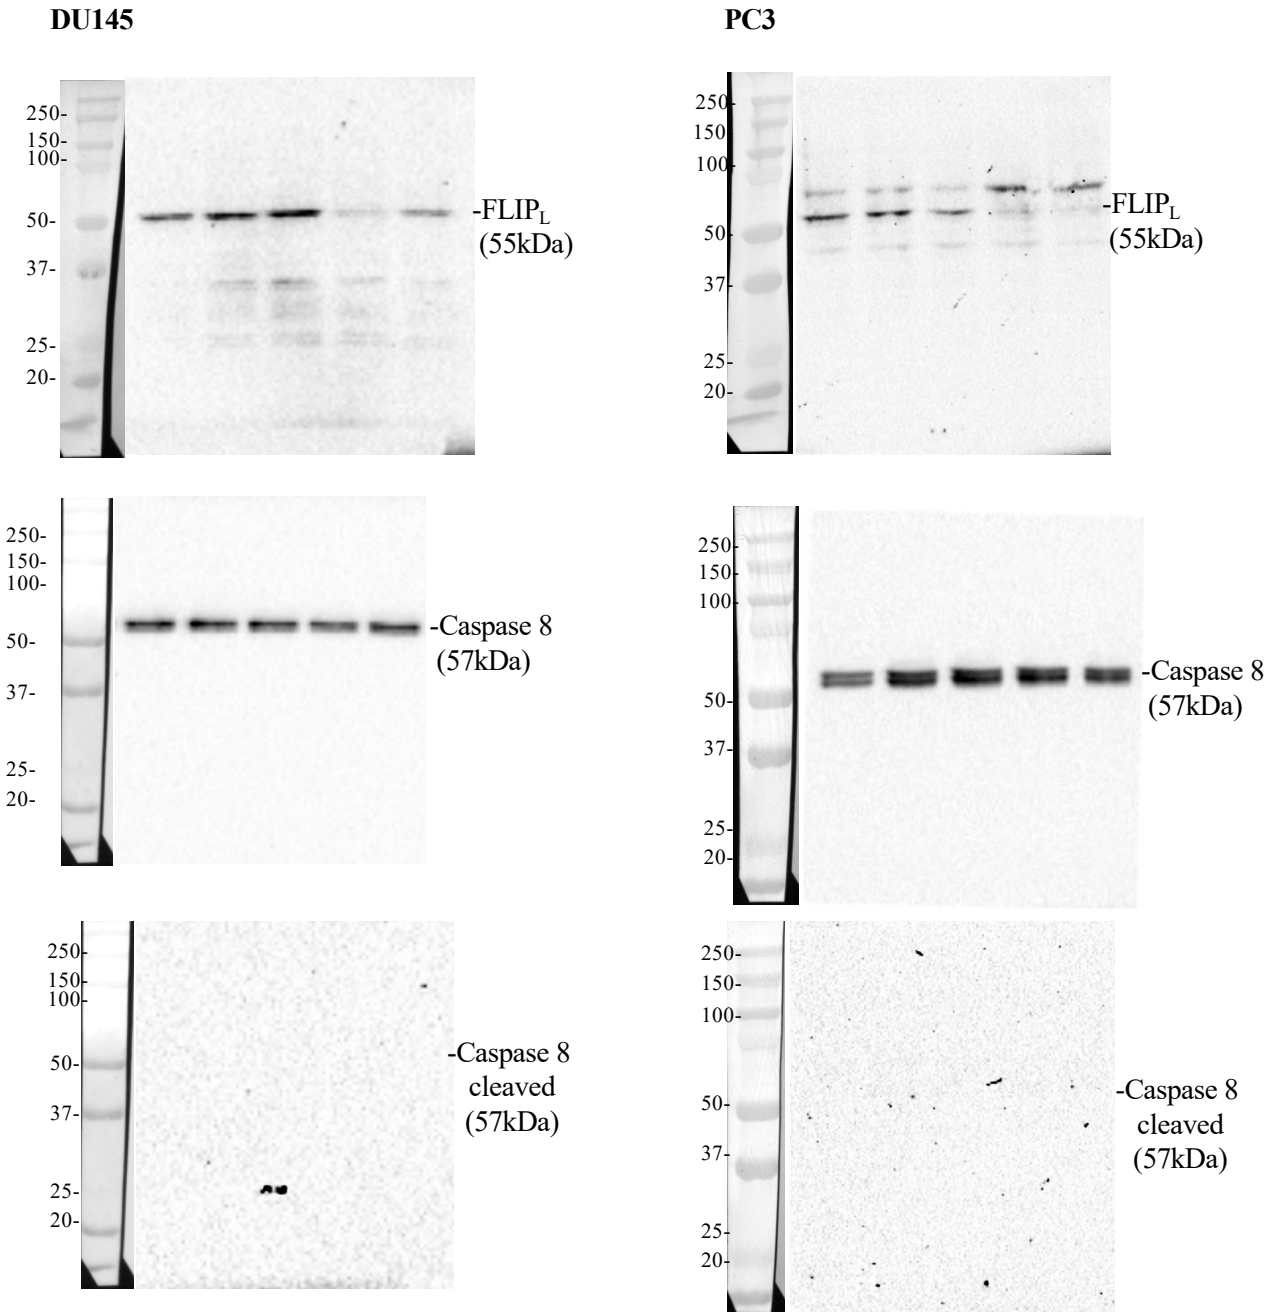

**Figure 2C**

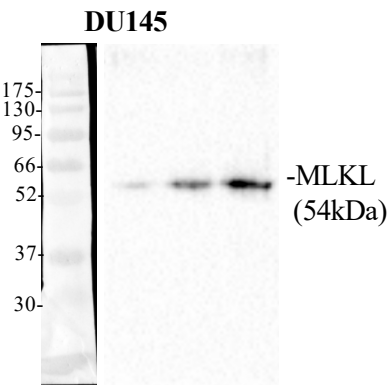

**Figure 2E**

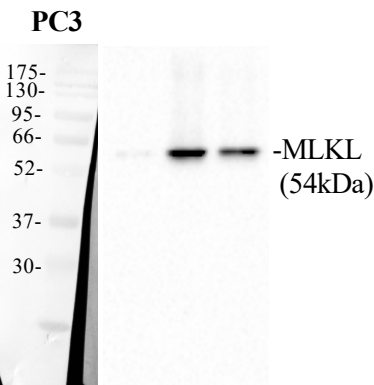

**Figure 3B**

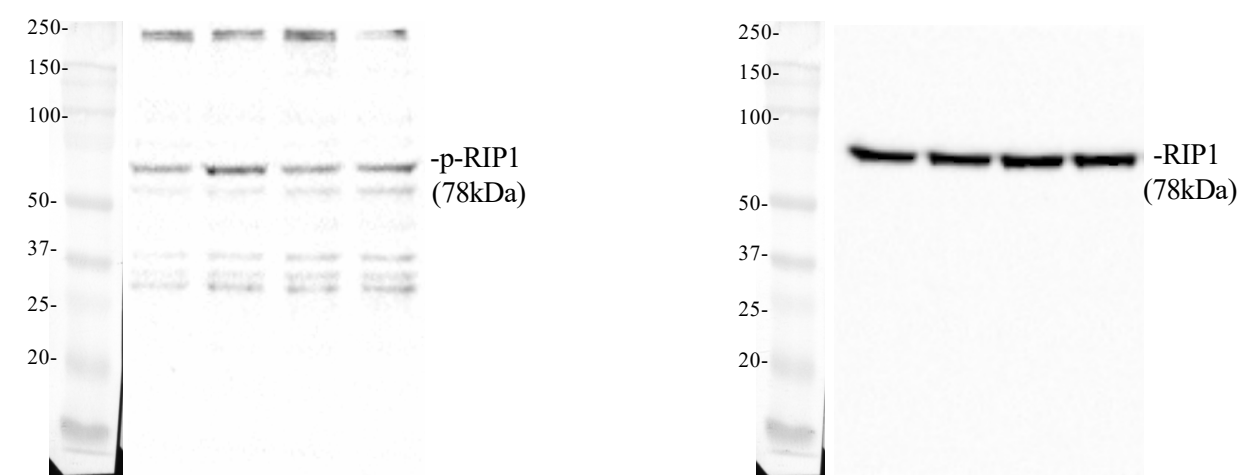

**Figure 3C**

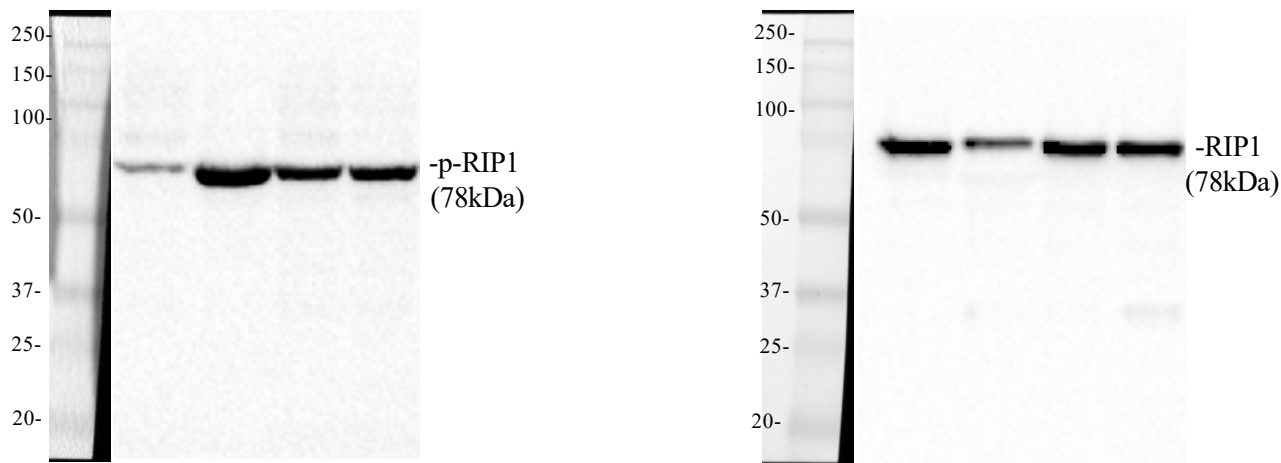



**Figure 4D**

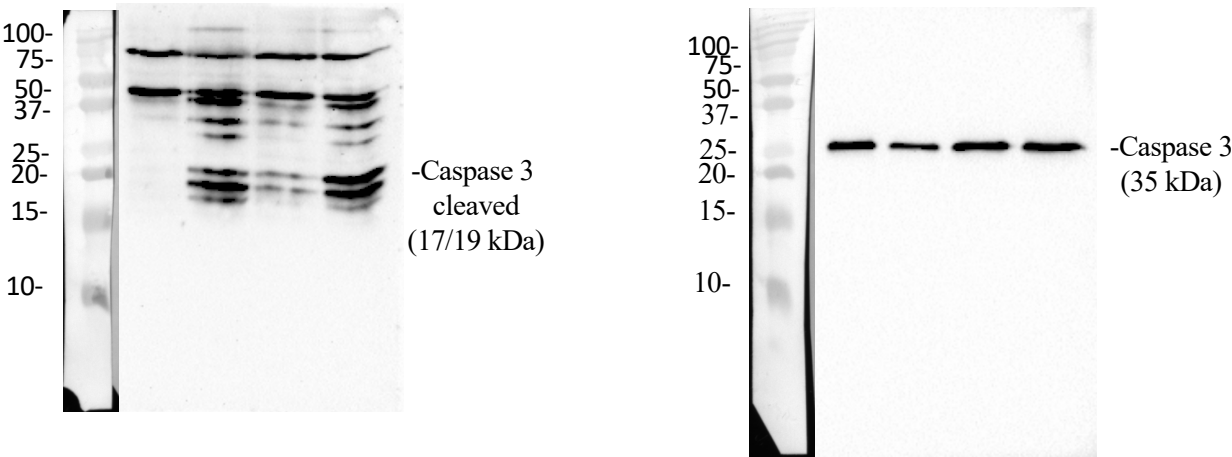

**Figure 4E**

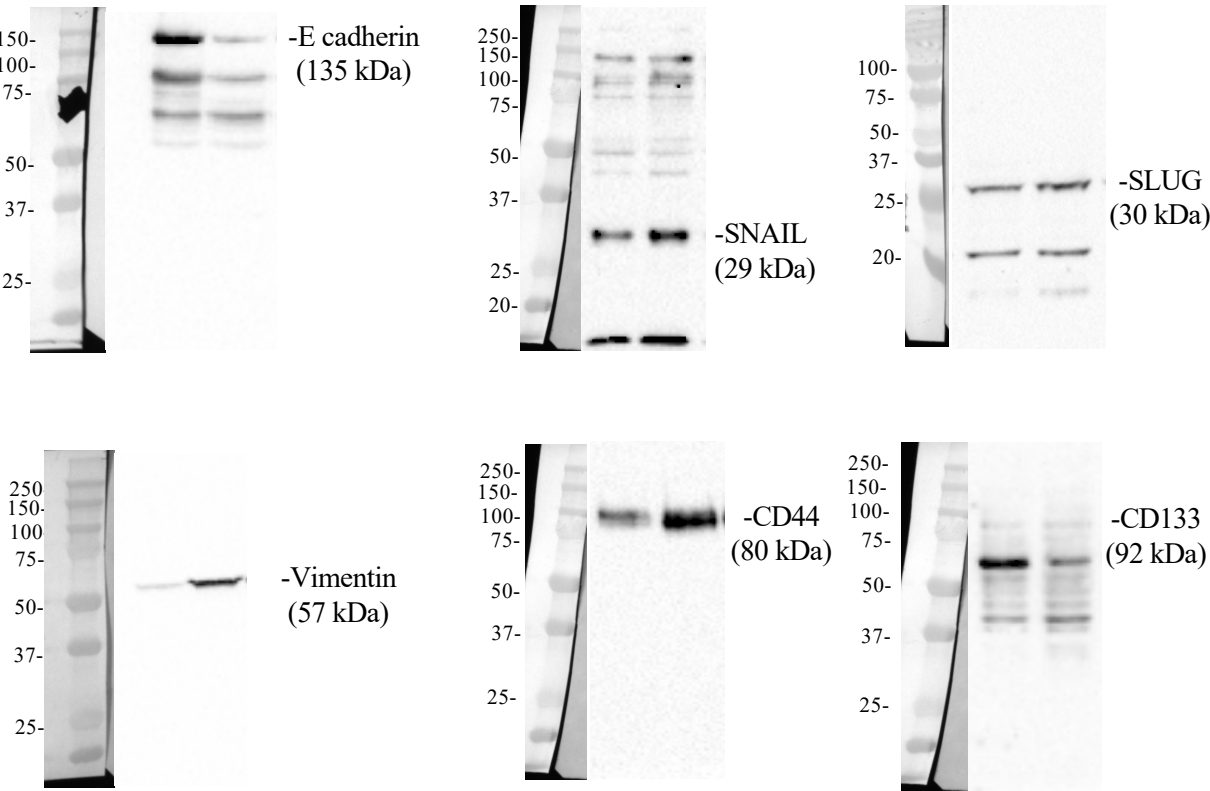

**Figure 4H**

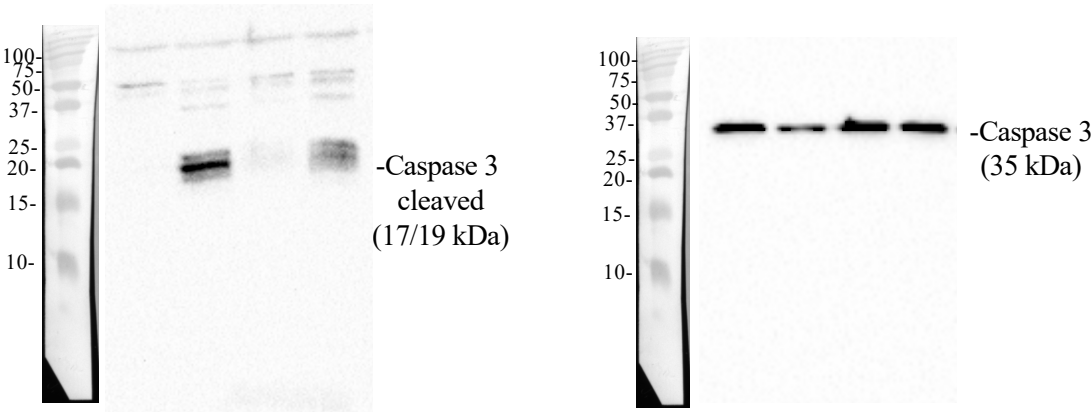

**Figure 5B**

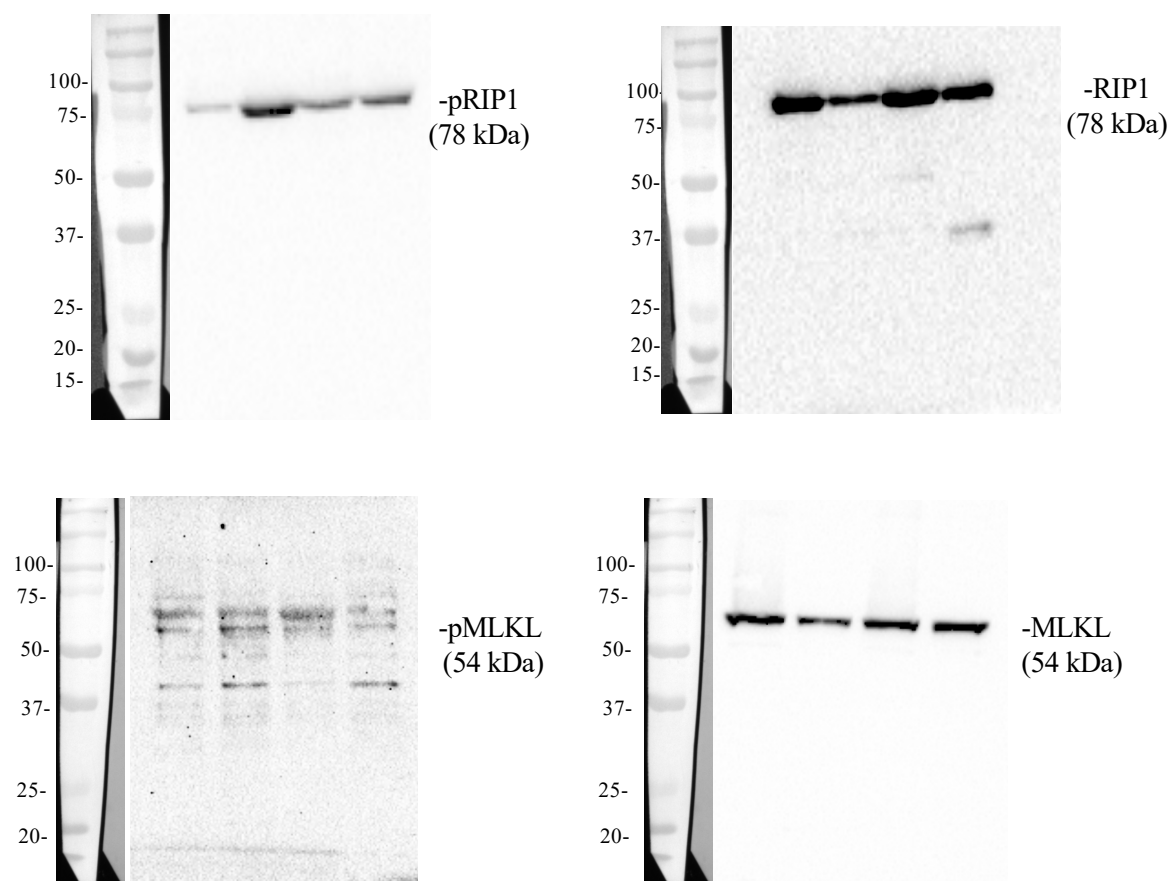

Supplement: s1 [file s1]
